# Supplementary material
Source: Springer Nature journal article supplement (https://www.springermedizin.de/resource/supplementary/13012_2013_640_MOESM2_ESM.pdf/9630426)

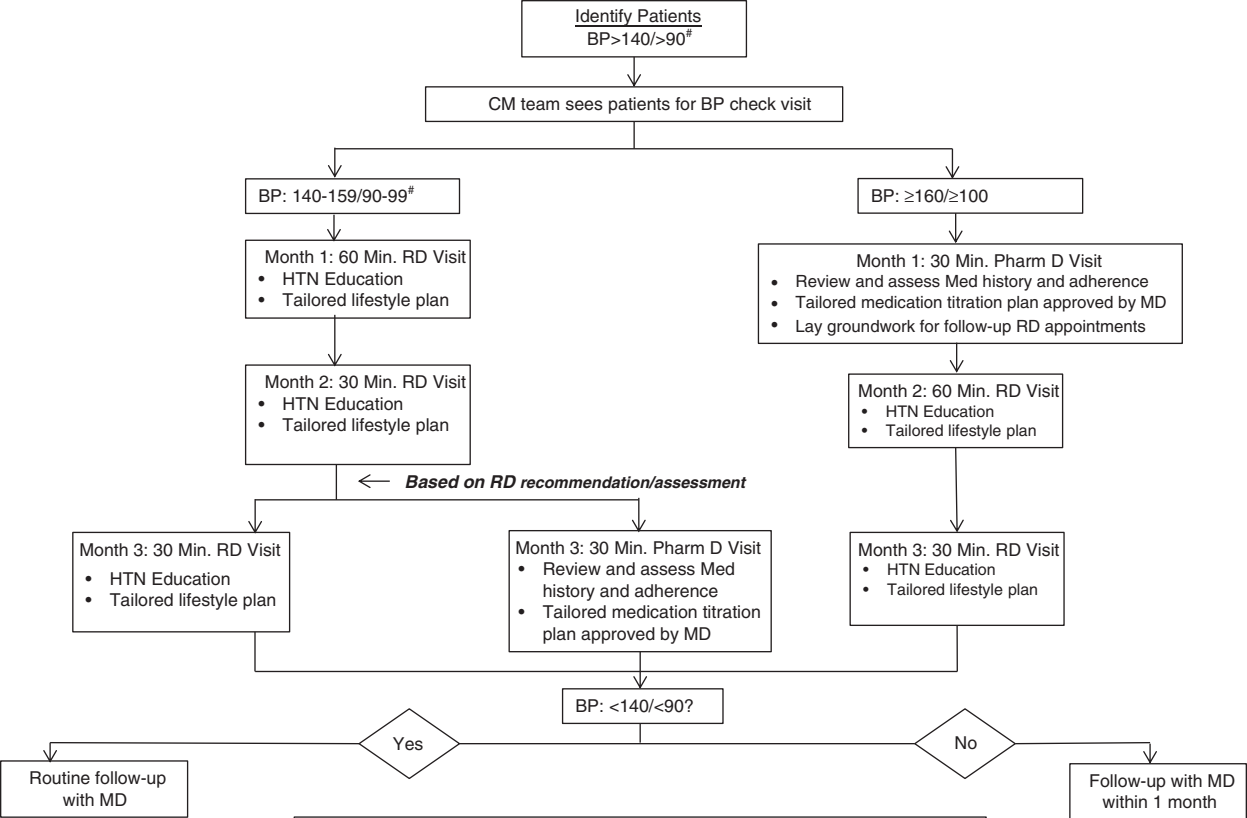

#-Patients with diabetes or chronic kidney disease would be if BP >130/>80

Supplement: MOESM2 [file 9630426]
